# Supplementary material for: Use of Inpatient Behavioral Health Services by Children and Adolescents With Private Insurance Coverage
Source: Atypon-hosted journal article supplement (doi:10.1176/appi.ps.201700493), 2018-06-20
Supplement: appi.ps.201700493.ds001.pdf [file appi.ps.201700493.ds001.pdf]

Psychiatric Inpatient Service Use<sup>a</sup> in 2009 and 2014, among Children and Adolescents  
Aged 2-18 Years with Private Insurance, by Facility Type<sup>b</sup>, Northeast

| Year                                                              | Acute Care Hospital,<br>Non-Psych Bed |        |      |        | Acute Care Hospital,<br>Psych/Detox Bed |        |       |        | Specialty<br>Psych Hospital |        |      |        |
|-------------------------------------------------------------------|---------------------------------------|--------|------|--------|-----------------------------------------|--------|-------|--------|-----------------------------|--------|------|--------|
|                                                                   | 2009                                  |        | 2014 |        | 2009                                    |        | 2014  |        | 2009                        |        | 2014 |        |
| <i>Enrollees with at least 1 inpatient stay (Person-level)</i>    |                                       |        |      |        |                                         |        |       |        |                             |        |      |        |
|                                                                   | N                                     | %      | N    | %      | N                                       | %      | N     | %      | N                           | %      | N    | %      |
| Enrollees ages 2-18 years with One or More Inpatient Stays        | 372                                   | 0.017% | 545  | 0.025% | 2,332                                   | 0.106% | 3,186 | 0.146% | 661                         | 0.030% | 987  | 0.045% |
| <i>Age group</i>                                                  |                                       |        |      |        |                                         |        |       |        |                             |        |      |        |
| Age 2 - 5 years                                                   | 11                                    | 2.96%  | 18   | 3.30%  | 8                                       | 0.34%  | 3     | 0.09%  | 3                           | 0.45%  | 4    | 0.41%  |
| Age 6 - 10 years                                                  | 29                                    | 7.80%  | 40   | 7.34%  | 143                                     | 6.13%  | 110   | 3.45%  | 45                          | 6.81%  | 47   | 4.76%  |
| Age 11 - 14 years                                                 | 77                                    | 20.70% | 131  | 24.04% | 554                                     | 23.76% | 807   | 25.33% | 155                         | 23.45% | 259  | 26.24% |
| Age 15 - 18 years                                                 | 255                                   | 68.55% | 356  | 65.32% | 1,627                                   | 69.77% | 2,266 | 71.12% | 458                         | 69.29% | 677  | 68.59% |
| <i>Gender</i>                                                     |                                       |        |      |        |                                         |        |       |        |                             |        |      |        |
| Male                                                              | 152                                   | 40.86% | 193  | 35.41% | 1,115                                   | 47.81% | 1,226 | 38.48% | 309                         | 46.75% | 393  | 39.82% |
| Female                                                            | 220                                   | 59.14% | 352  | 64.59% | 1,217                                   | 52.19% | 1,960 | 61.52% | 352                         | 53.25% | 594  | 60.18% |
| <i>Inpatient Stays (Encounter-level)</i>                          |                                       |        |      |        |                                         |        |       |        |                             |        |      |        |
| <i>Principal Diagnoses</i>                                        |                                       |        |      |        |                                         |        |       |        |                             |        |      |        |
| Adjustment Disorders                                              | 10                                    | 2.43%  | 6    | 0.98%  | 111                                     | 3.88%  | 99    | 2.45%  | 26                          | 3.19%  | 14   | 1.19%  |
| Anxiety Disorders                                                 | 18                                    | 4.38%  | 38   | 6.19%  | 100                                     | 3.49%  | 166   | 4.10%  | 34                          | 4.17%  | 60   | 5.11%  |
| ADD, conduct, and disruptive behavior disorders                   | 17                                    | 4.14%  | 15   | 2.44%  | 162                                     | 5.66%  | 154   | 3.81%  | 58                          | 7.11%  | 49   | 4.17%  |
| Disorders usually diagnosed in infancy, childhood, or adolescence | 27                                    | 6.57%  | 34   | 5.54%  | 80                                      | 2.79%  | 66    | 1.63%  | 25                          | 3.06%  | 11   | 0.94%  |

|                                                                            |            |        |             |        |            |        |             |        |            |        |            |        |
|----------------------------------------------------------------------------|------------|--------|-------------|--------|------------|--------|-------------|--------|------------|--------|------------|--------|
| Impulse control disorders, NEC                                             | 1          | 0.24%  | 3           | 0.49%  | 114        | 3.98%  | 112         | 2.77%  | 21         | 2.57%  | 22         | 1.87%  |
| Mood disorders                                                             | 107        | 26.03% | 189         | 30.78% | 2,062      | 72.00% | 3,181       | 78.60% | 594        | 72.79% | 953        | 81.11% |
| Personality disorders                                                      | 1          | 0.24%  | 3           | 0.49%  | 4          | 0.14%  | 11          | 0.27%  | 1          | 0.12%  |            |        |
| Schizophrenia and other psychotic disorders                                | 8          | 1.95%  | 17          | 2.77%  | 92         | 3.21%  | 120         | 2.97%  | 25         | 3.06%  | 42         | 3.57%  |
| Substance/Alcohol-related disorders                                        | 48         | 11.68% | 48          | 7.82%  | 68         | 2.37%  | 47          | 1.16%  | 27         | 3.31%  | 19         | 1.62%  |
| Other Mental Health Disorder                                               | 100        | 24.33% | 126         | 20.52% | 60         | 2.09%  | 84          | 2.08%  | 5          | 0.61%  | 5          | 0.43%  |
| Other Non-Behavioral Health Disorders with Injury/Suicidal Secondary Codes | 74         | 18.00% | 135         | 21.99% | 11         | 0.38%  | 7           | 0.17%  |            |        |            |        |
| Average Payment                                                            | \$9,461.47 |        | \$13,288.87 |        | \$8,088.16 |        | \$11,901.67 |        | \$7,165.33 |        | \$9,855.85 |        |
| Average Length of Stay (days)                                              | 5.03       |        | 4.92        |        | 7.74       |        | 8.19        |        | 8.36       |        | 8.78       |        |

Abbreviations: psych, psychiatric; detox, detoxification; ADD, attention deficit disorder; NEC, not elsewhere classified;

<sup>a</sup> Psychiatric inpatient stays were identified as inpatient stays in either an acute care hospital or a specialty psych hospital where the claim records indicated a primary mental health diagnosis or a secondary diagnosis of an intent-to-harm-self external injury code or a suicidal ideation code.

<sup>b</sup> The data source for this study was the Truven Health Analytics MarketScan® Commercial Database.

Psychiatric Inpatient Service Use<sup>a</sup> in 2009 and 2014, among Children and Adolescents  
Aged 2-18 Years with Private Insurance, by Facility Type<sup>b</sup>, North Central

| Year                                                              | Acute Care Hospital,<br>Non-Psych Bed |        |      |        | Acute Care Hospital,<br>Psych/Detox Bed |        |       |        | Specialty<br>Psych Hospital |        |      |        |
|-------------------------------------------------------------------|---------------------------------------|--------|------|--------|-----------------------------------------|--------|-------|--------|-----------------------------|--------|------|--------|
|                                                                   | 2009                                  |        | 2014 |        | 2009                                    |        | 2014  |        | 2009                        |        | 2014 |        |
| <i>Enrollees with at least 1 inpatient stay (Person-level)</i>    |                                       |        |      |        |                                         |        |       |        |                             |        |      |        |
|                                                                   | N                                     | %      | N    | %      | N                                       | %      | N     | %      | N                           | %      | N    | %      |
| Enrollees ages 2-18 years with One or More Inpatient Stays        | 467                                   | 0.015% | 647  | 0.028% | 3,579                                   | 0.115% | 4,609 | 0.155% | 677                         | 0.022% | 667  | 0.029% |
| <b>Age group</b>                                                  |                                       |        |      |        |                                         |        |       |        |                             |        |      |        |
| Age 2 - 5 years                                                   | 5                                     | 1.07%  | 7    | 1.08%  | 6                                       | 0.17%  | 1     | 0.02%  | 1                           | 0.15%  |      |        |
| Age 6 - 10 years                                                  | 33                                    | 7.07%  | 32   | 4.95%  | 239                                     | 6.68%  | 206   | 4.47%  | 36                          | 5.32%  | 31   | 4.65%  |
| Age 11 - 14 years                                                 | 96                                    | 20.56% | 165  | 25.50% | 796                                     | 22.24% | 1,170 | 25.39% | 167                         | 24.67% | 190  | 28.49% |
| Age 15 - 18 years                                                 | 333                                   | 71.31% | 443  | 68.47% | 2,538                                   | 70.91% | 3,232 | 70.12% | 473                         | 69.87% | 446  | 66.87% |
| <b>Gender</b>                                                     |                                       |        |      |        |                                         |        |       |        |                             |        |      |        |
| Male                                                              | 228                                   | 48.82% | 234  | 36.17% | 1,745                                   | 48.76% | 1,839 | 39.90% | 340                         | 50.22% | 263  | 39.43% |
| Female                                                            | 239                                   | 51.18% | 413  | 63.83% | 1,834                                   | 51.24% | 2,770 | 60.10% | 337                         | 49.78% | 404  | 60.57% |
| <i>Inpatient Stays (Encounter-level)</i>                          |                                       |        |      |        |                                         |        |       |        |                             |        |      |        |
| <b>Principal Diagnoses</b>                                        |                                       |        |      |        |                                         |        |       |        |                             |        |      |        |
| Adjustment Disorders                                              | 14                                    | 2.70%  | 4    | 0.57%  | 172                                     | 3.88%  | 139   | 2.38%  | 16                          | 1.88%  | 13   | 1.61%  |
| Anxiety Disorders                                                 | 16                                    | 3.09%  | 19   | 2.70%  | 220                                     | 4.97%  | 182   | 3.12%  | 32                          | 3.77%  | 19   | 2.35%  |
| ADD, conduct, and disruptive behavior disorders                   | 33                                    | 6.37%  | 20   | 2.84%  | 310                                     | 7.00%  | 177   | 3.03%  | 35                          | 4.12%  | 16   | 1.98%  |
| Disorders usually diagnosed in infancy, childhood, or adolescence | 11                                    | 2.12%  | 14   | 1.99%  | 58                                      | 1.31%  | 66    | 1.13%  | 5                           | 0.59%  | 6    | 0.74%  |
| Impulse control disorders, NEC                                    | 6                                     | 1.16%  | 1    | 0.14%  | 65                                      | 1.47%  | 92    | 1.58%  | 14                          | 1.65%  | 16   | 1.98%  |
| Mood disorders                                                    | 187                                   | 36.10% | 249  | 35.37% | 3,277                                   | 73.96% | 4,810 | 82.41% | 662                         | 77.97% | 691  | 85.52% |
| Personality disorders                                             | 1                                     | 0.19%  | 2    | 0.28%  | 15                                      | 0.34%  | 12    | 0.21%  | 4                           | 0.47%  |      |        |
| Schizophrenia and other psychotic disorders                       | 5                                     | 0.97%  | 12   | 1.70%  | 134                                     | 3.02%  | 200   | 3.43%  | 27                          | 3.18%  | 17   | 2.10%  |

|                                                                            |            |        |             |        |            |       |            |       |            |       |            |       |
|----------------------------------------------------------------------------|------------|--------|-------------|--------|------------|-------|------------|-------|------------|-------|------------|-------|
| Substance/Alcohol-related disorders                                        | 85         | 16.41% | 44          | 6.25%  | 117        | 2.64% | 57         | 0.98% | 38         | 4.48% | 19         | 2.35% |
| Other Mental Health Disorder                                               | 57         | 11.00% | 125         | 17.76% | 54         | 1.22% | 75         | 1.28% | 14         | 1.65% | 11         | 1.36% |
| Other Non-Behavioral Health Disorders with Injury/Suicidal Secondary Codes | 103        | 19.88% | 214         | 30.40% | 9          | 0.20% | 27         | 0.46% | 2          | 0.24% |            |       |
| Average Payment                                                            | \$7,780.31 |        | \$11,351.52 |        | \$6,447.67 |       | \$8,833.31 |       | \$5,762.53 |       | \$7,574.74 |       |
| Average Length of Stay (days)                                              | 5.30       |        | 4.71        |        | 5.81       |       | 5.78       |       | 5.61       |       | 6.30       |       |

Abbreviations: psych, psychiatric; detox, detoxification; ADD, attention deficit disorder; NEC, not elsewhere classified;

<sup>a</sup> Psychiatric inpatient stays were identified as inpatient stays in either an acute care hospital or a specialty psych hospital where the claim records indicated a primary mental health diagnosis or a secondary diagnosis of an intent-to-harm-self external injury code or a suicidal ideation code.

<sup>b</sup> The data source for this study was the Truven Health Analytics MarketScan® Commercial Database.

Psychiatric Inpatient Service Use<sup>a</sup> in 2009 and 2014, among Children and Adolescents  
Aged 2-18 Years with Private Insurance, by Facility Type<sup>b</sup>, South

| Year                                                              | Acute Care Hospital,<br>Non-Psych Bed |        |      |        | Acute Care Hospital,<br>Psych/Detox Bed |        |       |        | Specialty<br>Psych Hospital |        |       |        |
|-------------------------------------------------------------------|---------------------------------------|--------|------|--------|-----------------------------------------|--------|-------|--------|-----------------------------|--------|-------|--------|
|                                                                   | 2009                                  |        | 2014 |        | 2009                                    |        | 2014  |        | 2009                        |        | 2014  |        |
| <i>Enrollees with at least 1 inpatient stay (Person-level)</i>    |                                       |        |      |        |                                         |        |       |        |                             |        |       |        |
|                                                                   | N                                     | %      | N    | %      | N                                       | %      | N     | %      | N                           | %      | N     | %      |
| Enrollees ages 2-18 years with One or More Inpatient Stays        | 430                                   | 0.009% | 517  | 0.013% | 3,719                                   | 0.077% | 5,291 | 0.137% | 2,494                       | 0.052% | 1,980 | 0.051% |
| <i>Age group</i>                                                  |                                       |        |      |        |                                         |        |       |        |                             |        |       |        |
| Age 2 - 5 years                                                   | 11                                    | 2.56%  | 10   | 1.93%  | 10                                      | 0.27%  | 13    | 0.25%  | 5                           | 0.20%  | 2     | 0.10%  |
| Age 6 - 10 years                                                  | 34                                    | 7.91%  | 28   | 5.42%  | 243                                     | 6.53%  | 269   | 5.08%  | 146                         | 5.85%  | 82    | 4.14%  |
| Age 11 - 14 years                                                 | 84                                    | 19.53% | 117  | 22.63% | 925                                     | 24.87% | 1,497 | 28.29% | 593                         | 23.78% | 522   | 26.36% |
| Age 15 - 18 years                                                 | 301                                   | 70.00% | 362  | 70.02% | 2,541                                   | 68.32% | 3,512 | 66.38% | 1,750                       | 70.17% | 1,374 | 69.39% |
| <i>Gender</i>                                                     |                                       |        |      |        |                                         |        |       |        |                             |        |       |        |
| Male                                                              | 189                                   | 43.95% | 199  | 38.49% | 1,852                                   | 49.80% | 2,153 | 40.69% | 1,277                       | 51.20% | 803   | 40.56% |
| Female                                                            | 241                                   | 56.05% | 318  | 61.51% | 1,867                                   | 50.20% | 3,138 | 59.31% | 1,217                       | 48.80% | 1,177 | 59.44% |
| <i>Inpatient Stays (Encounter-level)</i>                          |                                       |        |      |        |                                         |        |       |        |                             |        |       |        |
| <i>Principal Diagnoses</i>                                        |                                       |        |      |        |                                         |        |       |        |                             |        |       |        |
| Adjustment Disorders                                              | 5                                     | 1.08%  | 18   | 3.29%  | 125                                     | 2.78%  | 196   | 3.02%  | 47                          | 1.53%  | 87    | 3.58%  |
| Anxiety Disorders                                                 | 23                                    | 4.97%  | 26   | 4.75%  | 139                                     | 3.09%  | 184   | 2.84%  | 52                          | 1.69%  | 66    | 2.72%  |
| ADD, conduct, and disruptive behavior disorders                   | 17                                    | 3.67%  | 9    | 1.65%  | 229                                     | 5.09%  | 199   | 3.07%  | 96                          | 3.13%  | 95    | 3.91%  |
| Disorders usually diagnosed in infancy, childhood, or adolescence | 24                                    | 5.18%  | 21   | 3.84%  | 37                                      | 0.82%  | 48    | 0.74%  | 29                          | 0.94%  | 18    | 0.74%  |
| Impulse control disorders, NEC                                    |                                       |        | 3    | 0.55%  | 85                                      | 1.89%  | 52    | 0.80%  | 39                          | 1.27%  | 42    | 1.73%  |
| Mood disorders                                                    | 65                                    | 14.04% | 86   | 15.72% | 3,530                                   | 78.41% | 5,424 | 83.66% | 2,546                       | 82.93% | 1,979 | 81.54% |

|                                                                            |            |        |             |        |            |       |            |       |            |       |            |       |
|----------------------------------------------------------------------------|------------|--------|-------------|--------|------------|-------|------------|-------|------------|-------|------------|-------|
| Personality disorders                                                      | 3          | 0.65%  | 1           | 0.18%  | 14         | 0.31% | 28         | 0.43% | 13         | 0.42% | 12         | 0.49% |
| Schizophrenia and other psychotic disorders                                | 10         | 2.16%  | 7           | 1.28%  | 197        | 4.38% | 199        | 3.07% | 129        | 4.20% | 72         | 2.97% |
| Substance/Alcohol-related disorders                                        | 88         | 19.01% | 68          | 12.43% | 71         | 1.58% | 67         | 1.03% | 104        | 3.39% | 37         | 1.52% |
| Other Mental Health Disorder                                               | 117        | 25.27% | 128         | 23.40% | 61         | 1.35% | 64         | 0.99% | 15         | 0.49% | 17         | 0.70% |
| Other Non-Behavioral Health Disorders with Injury/Suicidal Secondary Codes | 111        | 23.97% | 180         | 32.91% | 14         | 0.31% | 22         | 0.34% |            |       | 2          | 0.08% |
| Average Payment                                                            | \$8,797.71 |        | \$11,001.23 |        | \$7,708.71 |       | \$7,463.77 |       | \$5,356.63 |       | \$6,531.26 |       |
| Average Length of Stay (days)                                              | 4.10       |        | 4.46        |        | 6.43       |       | 6.07       |       | 6.43       |       | 6.34       |       |

Abbreviations: psych, psychiatric; detox, detoxification; ADD, attention deficit disorder; NEC, not elsewhere classified;

<sup>a</sup> Psychiatric inpatient stays were identified as inpatient stays in either an acute care hospital or a specialty psych hospital where the claim records indicated a primary mental health diagnosis or a secondary diagnosis of an intent-to-harm-self external injury code or a suicidal ideation code.

<sup>b</sup> The data source for this study was the Truven Health Analytics MarketScan® Commercial Database.

Psychiatric Inpatient Service Use<sup>a</sup> in 2009 and 2014, among Children and Adolescents  
Aged 2-18 Years with Private Insurance, by Facility Type<sup>b</sup>, West

| Year                                                              | Acute Care Hospital,<br>Non-Psych Bed |        |      |        | Acute Care Hospital,<br>Psych/Detox Bed |        |       |        | Specialty<br>Psych Hospital |        |      |        |
|-------------------------------------------------------------------|---------------------------------------|--------|------|--------|-----------------------------------------|--------|-------|--------|-----------------------------|--------|------|--------|
|                                                                   | 2009                                  |        | 2014 |        | 2009                                    |        | 2014  |        | 2009                        |        | 2014 |        |
| <i>Enrollees with at least 1 inpatient stay (Person-level)</i>    |                                       |        |      |        |                                         |        |       |        |                             |        |      |        |
|                                                                   | N                                     | %      | N    | %      | N                                       | %      | N     | %      | N                           | %      | N    | %      |
| Enrollees ages 2-18 years with One or More Inpatient Stays        | 216                                   | 0.009% | 315  | 0.014% | 1,578                                   | 0.067% | 2,558 | 0.112% | 426                         | 0.018% | 548  | 0.024% |
| <i>Age group</i>                                                  |                                       |        |      |        |                                         |        |       |        |                             |        |      |        |
| Age 2 - 5 years                                                   | 11                                    | 5.09%  | 14   | 4.44%  | 5                                       | 0.32%  | 5     | 0.20%  | 1                           | 0.23%  | 1    | 0.18%  |
| Age 6 - 10 years                                                  | 16                                    | 7.41%  | 16   | 5.08%  | 74                                      | 4.69%  | 69    | 2.70%  | 25                          | 5.87%  | 7    | 1.28%  |
| Age 11 - 14 years                                                 | 36                                    | 16.67% | 64   | 20.32% | 372                                     | 23.57% | 635   | 24.82% | 89                          | 20.89% | 135  | 24.64% |
| Age 15 - 18 years                                                 | 153                                   | 70.83% | 221  | 70.16% | 1,127                                   | 71.42% | 1,849 | 72.28% | 311                         | 73.00% | 405  | 73.91% |
| <i>Gender</i>                                                     |                                       |        |      |        |                                         |        |       |        |                             |        |      |        |
| Male                                                              | 101                                   | 46.76% | 108  | 34.29% | 780                                     | 49.43% | 995   | 38.90% | 224                         | 52.58% | 202  | 36.86% |
| Female                                                            | 115                                   | 53.24% | 207  | 65.71% | 798                                     | 50.57% | 1,563 | 61.10% | 202                         | 47.42% | 346  | 63.14% |
| <i>Inpatient Stays (Encounter-level)</i>                          |                                       |        |      |        |                                         |        |       |        |                             |        |      |        |
| <i>Principal Diagnoses</i>                                        |                                       |        |      |        |                                         |        |       |        |                             |        |      |        |
| Adjustment Disorders                                              | 2                                     | 0.89%  | 2    | 0.60%  | 28                                      | 1.45%  | 55    | 1.69%  | 6                           | 1.13%  | 9    | 1.35%  |
| Anxiety Disorders                                                 | 6                                     | 2.68%  | 5    | 1.51%  | 53                                      | 2.75%  | 86    | 2.65%  | 16                          | 3.02%  | 18   | 2.70%  |
| ADD, conduct, and disruptive behavior disorders                   | 8                                     | 3.57%  | 3    | 0.91%  | 61                                      | 3.16%  | 57    | 1.76%  | 16                          | 3.02%  | 7    | 1.05%  |
| Disorders usually diagnosed in infancy, childhood, or adolescence | 16                                    | 7.14%  | 19   | 5.74%  | 44                                      | 2.28%  | 45    | 1.39%  | 6                           | 1.13%  | 7    | 1.05%  |
| Impulse control disorders, NEC                                    | 1                                     | 0.45%  | 1    | 0.30%  | 28                                      | 1.45%  | 44    | 1.36%  | 16                          | 3.02%  | 6    | 0.90%  |
| Mood disorders                                                    | 14                                    | 6.25%  | 24   | 7.25%  | 1,509                                   | 78.23% | 2,733 | 84.20% | 398                         | 75.24% | 574  | 86.06% |

|                                                                            |             |        |             |        |            |       |             |       |             |       |            |       |
|----------------------------------------------------------------------------|-------------|--------|-------------|--------|------------|-------|-------------|-------|-------------|-------|------------|-------|
| Personality disorders                                                      |             |        | 1           | 0.30%  | 2          | 0.10% | 2           | 0.06% | 1           | 0.19% |            |       |
| Schizophrenia and other psychotic disorders                                | 7           | 3.13%  | 3           | 0.91%  | 115        | 5.96% | 121         | 3.73% | 35          | 6.62% | 33         | 4.95% |
| Substance/Alcohol-related disorders                                        | 52          | 23.21% | 41          | 12.39% | 50         | 2.59% | 40          | 1.23% | 31          | 5.86% | 9          | 1.35% |
| Other Mental Health Disorder                                               | 56          | 25.00% | 86          | 25.98% | 31         | 1.61% | 39          | 1.20% | 4           | 0.76% | 4          | 0.60% |
| Other Non-Behavioral Health Disorders with Injury/Suicidal Secondary Codes | 62          | 27.68% | 146         | 44.11% | 8          | 0.41% | 24          | 0.74% |             |       |            |       |
| Average Payment                                                            | \$11,534.82 |        | \$18,638.13 |        | \$8,822.61 |       | \$10,622.17 |       | \$10,434.03 |       | \$9,440.09 |       |
| Average Length of Stay (days)                                              | 2.94        |        | 3.68        |        | 7.03       |       | 6.29        |       | 6.73        |       | 7.08       |       |

Abbreviations: psych, psychiatric; detox, detoxification; ADD, attention deficit disorder; NEC, not elsewhere classified;

<sup>a</sup> Psychiatric inpatient stays were identified as inpatient stays in either an acute care hospital or a specialty psych hospital where the claim records indicated a primary mental health diagnosis or a secondary diagnosis of an intent-to-harm-self external injury code or a suicidal ideation code.

<sup>b</sup> The data source for this study was the Truven Health Analytics MarketScan® Commercial Database.



Psychiatric Inpatient Service Use<sup>a</sup> in 2009 and 2014, among Children and Adolescents  
Aged 2-18 Years with Private Insurance, by Facility Type<sup>b</sup>, Region Unknown

| Year                                                              | Acute Care Hospital,<br>Non-Psych Bed |        |      |        | Acute Care Hospital,<br>Psych/Detox Bed |        |      |        | Specialty<br>Psych Hospital |        |      |        |
|-------------------------------------------------------------------|---------------------------------------|--------|------|--------|-----------------------------------------|--------|------|--------|-----------------------------|--------|------|--------|
|                                                                   | 2009                                  |        | 2014 |        | 2009                                    |        | 2014 |        | 2009                        |        | 2014 |        |
| <i>Enrollees with at least 1 inpatient stay (Person-level)</i>    |                                       |        |      |        |                                         |        |      |        |                             |        |      |        |
|                                                                   | N                                     | %      | N    | %      | N                                       | %      | N    | %      | N                           | %      | N    | %      |
| Enrollees ages 2-18 years with One or More Inpatient Stays        | 139                                   | 0.024% | 63   | 0.023% | 850                                     | 0.147% | 437  | 0.158% | 19                          | 0.003% | 34   | 0.012% |
| <i>Age group</i>                                                  |                                       |        |      |        |                                         |        |      |        |                             |        |      |        |
| Age 2 - 5 years                                                   | 1                                     | 0.72%  | 1    | 1.59%  | 4                                       | 0.47%  |      |        |                             |        |      |        |
| Age 6 - 10 years                                                  | 15                                    | 10.79% | 7    | 11.11% | 59                                      | 6.94%  | 31   | 7.09%  | 1                           | 5.26%  | 1    | 2.94%  |
| Age 11 - 14 years                                                 | 23                                    | 16.55% | 14   | 22.22% | 206                                     | 24.24% | 117  | 26.77% | 1                           | 5.26%  | 9    | 26.47% |
| Age 15 - 18 years                                                 | 100                                   | 71.94% | 41   | 65.08% | 581                                     | 68.35% | 289  | 66.13% | 17                          | 89.47% | 24   | 70.59% |
| <i>Gender</i>                                                     |                                       |        |      |        |                                         |        |      |        |                             |        |      |        |
| Male                                                              | 67                                    | 48.20% | 30   | 47.62% | 418                                     | 49.18% | 185  | 42.33% | 8                           | 42.11% | 10   | 29.41% |
| Female                                                            | 72                                    | 51.80% | 33   | 52.38% | 432                                     | 50.82% | 252  | 57.67% | 11                          | 57.89% | 24   | 70.59% |
| <i>Inpatient Stays (Encounter-level)</i>                          |                                       |        |      |        |                                         |        |      |        |                             |        |      |        |
| <i>Principal Diagnoses</i>                                        |                                       |        |      |        |                                         |        |      |        |                             |        |      |        |
| Adjustment Disorders                                              | 1                                     | 0.64%  | 3    | 4.05%  | 34                                      | 3.33%  | 18   | 3.27%  | 1                           | 4.55%  | 2    | 5.13%  |
| Anxiety Disorders                                                 | 5                                     | 3.21%  | 4    | 5.41%  | 52                                      | 5.09%  | 29   | 5.26%  | 1                           | 4.55%  | 2    | 5.13%  |
| ADD, conduct, and disruptive behavior disorders                   | 8                                     | 5.13%  | 4    | 5.41%  | 41                                      | 4.02%  | 13   | 2.36%  | 1                           | 4.55%  | 1    | 2.56%  |
| Disorders usually diagnosed in infancy, childhood, or adolescence | 5                                     | 3.21%  | 3    | 4.05%  | 13                                      | 1.27%  | 5    | 0.91%  |                             |        |      |        |
| Impulse control disorders, NEC                                    | 1                                     | 0.64%  |      |        | 25                                      | 2.45%  | 5    | 0.91%  |                             |        | 1    | 2.56%  |
| Mood disorders                                                    | 72                                    | 46.15% | 34   | 45.95% | 781                                     | 76.49% | 444  | 80.58% | 13                          | 59.09% | 32   | 82.05% |

|                                                                            |            |        |             |        |            |       |            |       |            |       |             |       |
|----------------------------------------------------------------------------|------------|--------|-------------|--------|------------|-------|------------|-------|------------|-------|-------------|-------|
| Personality disorders                                                      | 1          | 0.64%  |             |        | 3          | 0.29% | 1          | 0.18% | 2          | 9.09% |             |       |
| Schizophrenia and other psychotic disorders                                | 3          | 1.92%  | 3           | 4.05%  | 39         | 3.82% | 22         | 3.99% | 2          | 9.09% | 1           | 2.56% |
| Substance/Alcohol-related disorders                                        | 13         | 8.33%  | 5           | 6.76%  | 26         | 2.55% | 4          | 0.73% | 2          | 9.09% |             |       |
| Other Mental Health Disorder                                               | 18         | 11.54% | 5           | 6.76%  | 6          | 0.59% | 6          | 1.09% |            |       |             |       |
| Other Non-Behavioral Health Disorders with Injury/Suicidal Secondary Codes | 29         | 18.59% | 13          | 17.57% | 1          | 0.10% | 4          | 0.73% |            |       |             |       |
| Average Payment                                                            | \$7,909.83 |        | \$10,392.42 |        | \$7,286.36 |       | \$9,312.98 |       | \$9,806.69 |       | \$10,414.51 |       |
| Average Length of Stay (days)                                              | 5.31       |        | 5.51        |        | 6.68       |       | 6.33       |       | 8.55       |       | 8.26        |       |

Abbreviations: psych, psychiatric; detox, detoxification; ADD, attention deficit disorder; NEC, not elsewhere classified;

<sup>a</sup> Psychiatric inpatient stays were identified as inpatient stays in either an acute care hospital or a specialty psych hospital where the claim records indicated a primary mental health diagnosis or a secondary diagnosis of an intent-to-harm-self external injury code or a suicidal ideation code.

<sup>b</sup> The data source for this study was the Truven Health Analytics MarketScan® Commercial Database.
